# Supplementary material
Source: PubMed Central journal article supplement (PMC5533933)
Supplement: JVI.00823-17_zjv999182802s1.pdf [file JVI.00823-17_zjv999182802s1.pdf]

Table S1. Primer pairs used in this study

| Primer              | Sequence (5' to 3')                                            |
|---------------------|----------------------------------------------------------------|
| L <sup>pro</sup> -F | <b>GGATCC</b> ATGCAGAACTCTCATTTTTCTTTTCG                       |
| L <sup>pro</sup> -R | <b>GGTACC</b> CTACTGTAGTTCATATACGATGTCC                        |
| VP1-F               | <b>GGTACC</b> ATGTCCACCGACAACGCCGAGACTGG                       |
| VP1-R               | <b>CTCGAG</b> CTATTGCATCAGCATCTTCTGCTTG                        |
| VP2-F               | <b>GAATTC</b> ATGGACCACAATACCGAAGAAATGG                        |
| VP2-R               | <b>CTCGAG</b> CTACTGTTCCTCGTCCGTCCCGGTCGTG                     |
| VP3-F               | <b>GAATTC</b> ATGGGGCCCATTCCCACAGCACCCAG                       |
| VP3-R               | <b>CTCGAG</b> CTAGTGGAACACATAAGAAGGATTAC                       |
| 2B-F                | <b>GGATCC</b> ATGCCTGCTTCTGACAACCCAATC                         |
| 2B-R                | <b>GGTACC</b> CTATTGCATCTTAAACAGCTTTTCGG                       |
| 2C-F                | <b>GAATTC</b> ATGGGACCCATGGACAAAGTCAAAGAC                      |
| 2C-R                | <b>CTCGAG</b> CTACTGTAGAACTAGAGTCTGCATATTTTCG                  |
| 3A-F                | <b>GGATCC</b> ATGAGCCCTAACGAGAATGATGAC                         |
| 3A-R                | <b>GGTACC</b> CTACTCGCTCCTAGGCGCTTTAG                          |
| 3C-F                | <b>GAATTC</b> ATGCAGCCCAACGTGGACATGGGCTTTG                     |
| 3C-R                | <b>CTCGAG</b> CTATTGCATTGTAGCCAGAGGTTCCACC                     |
| 3C-H49A-F           | GAG <sub>gcc</sub> ACATGGTCCAACCCCTCCTGGACCAGTTTCACAATCCGTGGTG |
| 3C-H49A-R           | CTGGTCCAGGAGGGGTTGGACCATGT <sub>ggc</sub> CTCATTAATTAGGAAGGTCC |
| 3C-C161A-F          | GGGTGACCACCTACAAGGGATGG <sub>gcc</sub> GGTTCGGCCCTGGTCTGTGAGGC |
| 3C-C161A-R          | CCGAACC <sub>ggc</sub> CCATCCCTTGTAGGTGGTCACCCTGTACC           |
| MAVS-Q148A-F        | GAGACC <sub>gcc</sub> GCGCCAGAGTCCCCAGGAGAGAATTCAGAGC          |
| MAVS-Q148A-R        | CTCCTGGGGACTCTGGGCG <sub>ggc</sub> GGTCTCCTGGACAGGCATGG        |
| MAVS-Q159A-F        | GAGAATTCAGAG <sub>ggc</sub> GCCCTGCAGACGCTCAGCCCCAGAGCCATCC    |
| MAVS-Q159A-R        | CGTCTGCAGGGC <sub>gcc</sub> CTCTGAATTCTCCTGGGGACTCTGG          |
| MAVS-Q162A-F        | GAGCAAGCCCTG <sub>ggc</sub> ACGCTCAGCCCCAGAGCCATCCCAAGG        |
| MAVS-Q162A-R        | GGGGCTGAGCGT <sub>gcc</sub> CAGGGCTTGCTCTGAATTCTCCTGG          |
| MAVS-Q196A-F        | CTCCAGCGGGCAT <sub>ggc</sub> GAGCAGGACACAGA ACTGGGCAGTACC      |
| MAVS-Q196A-R        | CTGTGTCCTGCTC <sub>gcc</sub> ATGCCCGCTGGAGGTCAGAGGGCTGAGG      |
| MAVS-Q198A-F        | GGGCATCAGGAG <sub>ggc</sub> GACACAGA ACTGGGCAGTACCCACACAG      |
| MAVS-Q198A-R        | CAGTTCTGTGTC <sub>gcc</sub> CTCCTGATGCCCGCTGGAGGTCAGAGG        |
| MAVS-N148-R         | <b>CTCGAG</b> CTACTGGGTCTCCTGGACAGGCATGGGGTAACTTGG             |
| MAVS-C149-R         | <b>GGTACC</b> ATGGCGCCAGAGTCCCCAGGAGAGAATTCAGAGC               |
| TRIF-Q159A-F        | CCAGGGAGCATCCGGACGCTC <sub>gcc</sub> TCCAATCTGGGCTGCCTCCCAC    |
| TRIF-Q159A-R        | GTGGGAGGCAGCCCAGATTGGA <sub>ggc</sub> GAGCGTCCGGATGCTCCCTGG    |
| TRIF-Q190A-F        | CGGACTGGAGC <sub>gcc</sub> GGGTGCTCCCTGCGATCCACTGGCAGCCCTG     |
| TRIF-Q190A-R        | GCAGGGAGCACCC <sub>ggc</sub> GCTCCAGTCCGAAACACCGTCAATGGGGCGTGG |
| TRIF-N159-F         | <b>GAATTC</b> ATGGCCTGCACAGGCCCATC                             |
| TRIF-N159-R         | <b>GTCGACT</b> CACTGGAGCGTCCGGATGCTCCCTG                       |
| TRIF-C159-F         | <b>GAATTC</b> TCCAATCTGGGCTGCCTCCCAC                           |
| TRIF-C159-R         | <b>GTCGACT</b> CATTCTGCCTCCTGCGTC                              |
| TANK-Q266A-F        | GTGTGC <sub>gcc</sub> GAGAAATTTAATATGGAGTTCAGAGACAACC          |

|                 |                                                     |
|-----------------|-----------------------------------------------------|
| TANK-Q266A-R    | CATATTAAATTTCTCggcGCACACTGCCTCAGACGTGGCAG           |
| TANK-Q291A-F    | GAAATTgccGGAATTGACCCCATAGCTTCAGCTATACAAAACC         |
| TANK-Q291A-R    | GCTGAAGCTATGGGGTCAATTCCggcAATTTCAAATAAAGTTTCTTC     |
| TANK-Q301A-F    | GCTATAgccAACCTTAAACAACACTGACAAAACAAAGCCCTC          |
| TANK-Q301A-R    | GTCAGTTGTTTTAAGGTTggcTATAGCTGAAGCTATGGGGTC          |
| TANK-Q366A-F    | CCAgccCAGCCCATTTGGAAGCCCTTTCCTAATCAAGACAGTGAC       |
| TANK-Q366A-R    | AGGAAAGGGCTTCCAAATGGGCTGggcTGGTCCTCGGATTGC          |
| TANK-H247A-F    | CAACTTTCTTAgccAGCACTCCAGAGAGACCCGGCATCCTTAGTCCTGC   |
| TANK-H247A-R    | CTCTCTGGAGTGCTggcTAAGAAAGTTGAGTCATTGTCCATAGGTGGAAAC |
| TANK-E251A-F    | CATAGCACTCCAgccAGACCCGGCATCCTTAGTCCTGCCACGTCTGAGG   |
| TANK-E251A-R    | GATGCCGGGTCTggcTGGAGTGCTATGTAAGAAAGTTGAGTCATTGTCC   |
| TANK-E262A-F    | GTCTgccGCAGTGTGCCAAGAGAAATTTAATATGGAGTTCAGAGAC      |
| TANK-E262A-R    | AAATTTCTCTTGGCACACTGCggcAGACGTGGCAGGACTAAGGATG      |
| TANK-E272A-F    | GAAATTTAATATGgccTTCAGAGACAACCCAGGGAACCTTTGTTAAAC    |
| TANK-E272A-R    | GTCTCTGAAggcCATATTAATTTCTCTTGGCACACTGCCTCAGACGc     |
| TANK(C273)-F    | <b>AGATCT</b> <b>ATG</b> TTTCAGAGACAACCCAGGGAACCTTG |
| TANK(C292)-F    | <b>AGATCT</b> <b>ATG</b> GGAATTGACCCCATAGCTTCAGC    |
| IFN $\beta$ -F  | CACGACAGCTCTTCCATC                                  |
| IFN $\beta$ -R  | AGCCAGTGCTCGATGAATCT                                |
| ISG56-F         | TCTGCCTATCGCCTGGATGG                                |
| ISG56-R         | GCTTCAGGGCAAGGAGACC                                 |
| TNF $\alpha$ -F | CCGAGTGACAAGCCTGTAG                                 |
| TNF $\alpha$ -R | GGTCTGGTAGGAGACGGCG                                 |
| IL-6-F          | CCAGGAGCCCAGCTATGAAC                                |
| IL-6-R          | CTGAGATGCCGTCGAGGATG                                |
| GAPDH-F         | GAGTCAACGGATTTGGTCGT                                |
| GAPDH-R         | GACAAGCTTCCCGTTCTCAG                                |

Red letters: restriction enzyme; Bold letters: initiation codon (ATG) or termination codon (TCA);  
Lowercase: site-directed mutations corresponding codon.
